# Supplementary material
Source: Elsevier journal article supplement (https://univ-rennes.hal.science/hal-01475811v1/file/mmc1.pdf)
Supplement: mmc1 [file mmc1.pdf]

## Supplementary material

**Palladium-catalysed direct arylation of heteroarenes using 1-bromophenyl-1,2,3-triazoles as aryl sources**

Halima Hadj Mokhtar,<sup>a,b</sup> Nouria Laidaoui,<sup>a,b,c</sup> Douniazad El Abed,<sup>b\*</sup> Jean-François Soulé,<sup>a\*</sup> Henri Doucet<sup>a\*</sup>

<sup>a</sup> Institut des Sciences Chimiques de Rennes, UMR 6226 CNRS-Université de Rennes "Organométalliques : Matériaux et Catalyse", Campus de Beaulieu, 35042 Rennes, France. Fax: (+33)2-23-23-63-84 E-mail: henri.doucet@univ-rennes1.fr

<sup>b</sup> Laboratoire de Chimie Fine, Département de Chimie, Faculté des Sciences Exactes et Appliquées, Université d'Oran 1 Ahmed BenBella, BP. 1524, EL M'naouer Oran 31100 Algérie.

<sup>c</sup> Université des Sciences et de la Technologie d'Oran BP. 1505 El M'naouer Oran 31000 Algérie.

**General:** All reactions were performed in Schlenk tubes under argon. Potassium acetate 99+ was used. DMA (99%) was purchased from Acros. Pd(OAc)<sub>2</sub>, [Pd(C<sub>3</sub>H<sub>5</sub>)Cl]<sub>2</sub>, 1,4-bis(diphenylphosphino)butane (98%) were purchased from Alfa Aesar. The heteroarenes were used without purification. NMR spectra were recorded on Bruker GPX (400 MHz) spectrometer in CDCl<sub>3</sub> solutions. Chemical shifts are reported in ppm relative to CDCl<sub>3</sub> (<sup>1</sup>H: 7.26 and <sup>13</sup>C: 77.0). Flash chromatography was performed on silica gel (230-400 mesh).

**Preparation of the PdCl(C<sub>3</sub>H<sub>5</sub>)(dppb) catalyst [1]:** An oven-dried 40 mL Schlenk tube equipped with a magnetic stirring bar under argon atmosphere, was charged with [Pd(C<sub>3</sub>H<sub>5</sub>)Cl]<sub>2</sub> (182 mg, 0.5 mmol) and dppb (426 mg, 1 mmol). 10 mL of anhydrous dichloromethane were added, then, the solution was stirred at room temperature for twenty minutes. The solvent was removed in vacuum. The yellow powder was used without purification. <sup>31</sup>P NMR (81 MHz, CDCl<sub>3</sub>) δ = 19.3 (s).

**The bromo-substituted 1-aryl-1,2,3-triazoles 1-7 were prepared using a reported procedure [2].**

In a typical experiment, the β-dicarbonyl compound (1 mmol), morpholine (0.087 g, 1 mmol) and the bromophenyl azide (1 mmol) were dissolved in Et<sub>2</sub>O (2 mL). The reaction mixture was stirred at room temperature for 24 h. Then, the solvent was evaporated and the product was recrystallized in ethanol or purified by silica gel column chromatography (pentane:AcOEt).

**General procedure for the synthesis of compounds 8-26:** In a typical experiment, the 1-(bromophenyl)-1,2,3-triazole **1-6** (1 mmol), heteroarene (1.5 mmol), KOAc (0.196 g, 2 mmol) and Pd(OAc)<sub>2</sub> (2.2 mg, 0.01 mmol) or PdCl(C<sub>3</sub>H<sub>5</sub>)(dppb) (6.1 mg, 0.01 mmol) (see table or schemes) were dissolved in DMA (4 mL) under an argon atmosphere. The reaction mixture was stirred at 150 °C for 16 h. Then, the solvent was evaporated and the product was purified by silica gel column chromatography.

**Ethyl 1-(4-(2-ethyl-4-methylthiazol-5-yl)phenyl)-5-methyl-1,2,3-triazole-4-carboxylate (8)**

From ethyl 1-(4-bromophenyl)-5-methyl-1,2,3-triazole-4-carboxylate **1** (0.310 g, 1 mmol) and 2-ethyl-4-methylthiazole (0.191 g, 1.5 mmol), **8** was obtained in 91% (0.324 g) yield.

<sup>1</sup>H NMR (400 MHz, CDCl<sub>3</sub>): δ 7.62 (d, *J* = 8.4 Hz, 2H), 7.51 (d, *J* = 8.4 Hz, 2H), 4.47 (q, *J* = 7.4 Hz, 2H), 3.03 (q, *J* = 7.4 Hz, 2H), 2.65 (s, 3H), 2.51 (s, 3H), 1.45 (t, *J* = 7.4 Hz, 3H), 1.42 (t, *J* = 7.4 Hz, 3H).

<sup>13</sup>C NMR (100 MHz, CDCl<sub>3</sub>): δ 171.1, 161.7, 148.1, 138.9, 136.8, 134.6, 134.4, 130.2, 129.1, 125.5, 61.1, 26.9, 16.1, 14.4, 14.2, 10.0.

elemental analysis: calcd (%) for C<sub>18</sub>H<sub>20</sub>N<sub>4</sub>O<sub>2</sub>S (356.44): C 60.65, H 5.66; found: C 60.71, H 5.48.

**Ethyl 5-methyl-1-(4-(5-methylthiophen-2-yl)phenyl)-1,2,3-triazole-4-carboxylate (9)**

From ethyl 1-(4-bromophenyl)-5-methyl-1,2,3-triazole-4-carboxylate **1** (0.310 g, 1 mmol) and 2-methylthiophene (0.147 g, 1.5 mmol), **9** was obtained in 87% (0.284 g) yield.

<sup>1</sup>H NMR (400 MHz, CDCl<sub>3</sub>): δ 7.74 (d, *J* = 8.4 Hz, 2H), 7.46 (d, *J* = 8.4 Hz, 2H), 7.23 (d, *J* = 3.5 Hz, 1H), 6.80 (d, *J* = 3.5 Hz, 1H), 4.50 (q, *J* = 7.4 Hz, 2H), 2.64 (s, 3H), 2.56 (s, 3H), 1.48 (t, *J* = 7.4 Hz, 3H).

<sup>13</sup>C NMR (100 MHz, CDCl<sub>3</sub>): δ 161.8, 141.2, 139.8, 138.8, 136.8, 136.6, 133.8, 126.6, 126.3, 125.7, 124.3, 61.1, 15.5, 14.3, 10.1.

elemental analysis: calcd (%) for C<sub>17</sub>H<sub>17</sub>N<sub>3</sub>O<sub>2</sub>S (327.40): C 62.37, H 5.23; found: C 62.50, H 5.12.

**Ethyl 1-(4-(5-acetylthiophen-2-yl)phenyl)-5-methyl-1,2,3-triazole-4-carboxylate (10)**

From ethyl 1-(4-bromophenyl)-5-methyl-1,2,3-triazole-4-carboxylate **10** (0.310 g, 1 mmol) and 2-acetylthiophene (0.189 g, 1.5 mmol), **9** was obtained in 85% (0.301 g) yield.

<sup>1</sup>H NMR (400 MHz, CDCl<sub>3</sub>): δ 7.85 (d, *J* = 8.4 Hz, 2H), 7.71 (d, *J* = 3.5 Hz, 1H), 7.54 (d, *J* = 8.4 Hz, 2H), 7.43 (d, *J* = 3.5 Hz, 1H), 4.48 (q, *J* = 7.4 Hz, 2H), 2.65 (s, 3H), 2.61 (s, 3H), 1.47 (t, *J* = 7.4 Hz, 3H).

<sup>13</sup>C NMR (100 MHz, CDCl<sub>3</sub>): δ 190.4, 161.6, 150.1, 144.4, 138.7, 136.9, 135.5, 135.1, 133.3, 127.3, 125.9, 125.1, 61.1, 26.7, 14.3, 10.1.

elemental analysis: calcd (%) for C<sub>18</sub>H<sub>17</sub>N<sub>3</sub>O<sub>3</sub>S (355.41): C 60.83, H 4.82; found: C 60.96, H 4.75.

**Ethyl 1-(4-(5-cyanothiophen-2-yl)phenyl)-5-methyl-1,2,3-triazole-4-carboxylate (11)**

From ethyl 1-(4-bromophenyl)-5-methyl-1,2,3-triazole-4-carboxylate **1** (0.310 g, 1 mmol) and thiophene-2-carbonitrile (0.164 g, 1.5 mmol), **11** was obtained in 87% (0.294 g) yield.

<sup>1</sup>H NMR (400 MHz, CDCl<sub>3</sub>): δ 7.82 (d, *J* = 8.4 Hz, 2H), 7.66 (d, *J* = 3.5 Hz, 1H), 7.58 (d, *J* = 8.4 Hz, 2H), 7.40 (d, *J* = 3.5 Hz, 1H), 4.50 (q, *J* = 7.4 Hz, 2H), 2.67 (s, 3H), 1.48 (t, *J* = 7.4 Hz, 3H).

<sup>13</sup>C NMR (100 MHz, CDCl<sub>3</sub>): δ 161.6, 149.3, 138.8, 138.5, 137.1, 136.0, 134.0, 127.6, 126.1, 124.5, 113.9, 109.8, 61.1, 14.4, 10.1.

elemental analysis: calcd (%) for C<sub>17</sub>H<sub>14</sub>N<sub>4</sub>O<sub>2</sub>S (338.39): C 60.34, H 4.17; found: C 60.12, H 4.31.

**Ethyl 1-(4-(5-butylfuran-2-yl)phenyl)-5-methyl-1,2,3-triazole-4-carboxylate (12)**

From ethyl 1-(4-bromophenyl)-5-methyl-1,2,3-triazole-4-carboxylate **1** (0.310 g, 1 mmol) and 2-*n*-butylfuran (0.186 g, 1.5 mmol), **12** was obtained in 82% (0.289 g) yield.

<sup>1</sup>H NMR (400 MHz, CDCl<sub>3</sub>): δ 7.80 (d, *J* = 8.4 Hz, 2H), 7.46 (d, *J* = 8.4 Hz, 2H), 6.68 (d, *J* = 3.2 Hz, 1H), 6.12 (d, *J* = 3.2 Hz, 1H), 4.49 (q, *J* = 7.4 Hz, 2H), 2.72 (t, *J* = 7.4 Hz, 2H), 2.61 (s, 3H), 1.70 (quint., *J* = 7.4 Hz, 2H), 1.53-1.40 (m, 5H), 0.97 (t, *J* = 7.4 Hz, 3H).

<sup>13</sup>C NMR (100 MHz, CDCl<sub>3</sub>): δ 161.7, 157.7, 150.3, 138.8, 136.7, 133.3, 132.8, 125.5, 124.0, 107.7, 107.3, 61.0, 30.1, 27.8, 22.2, 14.3, 13.7, 10.0.

elemental analysis: calcd (%) for C<sub>20</sub>H<sub>23</sub>N<sub>3</sub>O<sub>3</sub> (353.42): C 67.97, H 6.56; found: C 68.11, H 6.44.

**Ethyl 1-(4-(5-(methoxycarbonyl)furan-2-yl)phenyl)-5-methyl-1,2,3-triazole-4-carboxylate (13)**

From ethyl 1-(4-bromophenyl)-5-methyl-1,2,3-triazole-4-carboxylate **1** (0.310 g, 1 mmol) and methyl furan-2-carboxylate (0.189 g, 1.5 mmol), **13** was obtained in 73% (0.259 g) yield.

<sup>1</sup>H NMR (400 MHz, CDCl<sub>3</sub>): δ 8.01 (d, *J* = 8.4 Hz, 2H), 7.56 (d, *J* = 8.4 Hz, 2H), 7.32 (d, *J* = 3.6 Hz, 1H), 6.90 (d, *J* = 3.6 Hz, 1H), 4.50 (q, *J* = 7.4 Hz, 2H), 3.97 (s, 3H), 2.66 (s, 3H), 1.48 (t, *J* = 7.4 Hz, 3H).

<sup>13</sup>C NMR (100 MHz, CDCl<sub>3</sub>): δ 161.7, 159.0, 155.5, 144.5, 138.8, 135.4, 131.1, 125.9, 125.7, 119.9, 108.5, 61.2, 52.0, 14.4, 10.1.

elemental analysis: calcd (%) for C<sub>18</sub>H<sub>17</sub>N<sub>3</sub>O<sub>5</sub> (355.35): C 60.84, H 4.82; found: C 60.71, H 4.61.

**Ethyl 1-(4-(4-(methoxycarbonyl)-5-methylfuran-2-yl)phenyl)-5-methyl-1,2,3-triazole-4-carboxylate (14)**

From ethyl 1-(4-bromophenyl)-5-methyl-1,2,3-triazole-4-carboxylate **1** (0.310 g, 1 mmol) and methyl 2-methylfuran-3-carboxylate (0.210 g, 1.5 mmol), **14** was obtained in 83% (0.306 g) yield.

<sup>1</sup>H NMR (400 MHz, CDCl<sub>3</sub>): δ 7.83 (d, *J* = 8.4 Hz, 2H), 7.49 (d, *J* = 8.4 Hz, 2H), 7.03 (s, 1H), 4.48 (q, *J* = 7.4 Hz, 2H), 3.88 (s, 3H), 2.70 (s, 3H), 2.63 (s, 3H), 1.47 (t, *J* = 7.4 Hz, 3H).

<sup>13</sup>C NMR (100 MHz, CDCl<sub>3</sub>): δ 164.1, 161.7, 159.7, 150.0, 138.8, 136.8, 134.2, 131.6, 125.7, 124.5, 115.5, 107.4, 61.1, 51.5, 14.4, 13.9, 10.0.

elemental analysis: calcd (%) for C<sub>19</sub>H<sub>19</sub>N<sub>3</sub>O<sub>5</sub> (369.38): C 61.78, H 5.18; found: C 61.90, H 5.24.

**Ethyl 1-(4-(5-formyl-1-methyl-pyrrol-2-yl)phenyl)-5-methyl-1,2,3-triazole-4-carboxylate (15)**

From ethyl 1-(4-bromophenyl)-5-methyl-1,2,3-triazole-4-carboxylate **1** (0.310 g, 1 mmol) and 1-methylpyrrole-2-carbaldehyde (0.163 g, 1.5 mmol), **15** was obtained in 77% (0.260 g) yield.

<sup>1</sup>H NMR (400 MHz, CDCl<sub>3</sub>): δ 9.65 (s, 1H), 7.66 (d, *J* = 8.4 Hz, 2H), 7.60 (d, *J* = 8.4 Hz, 2H), 7.04 (d, *J* = 4.1 Hz, 1H), 6.42 (d, *J* = 4.1 Hz, 1H), 4.50 (q, *J* = 7.4 Hz, 2H), 4.00 (s, 3H), 2.68 (s, 3H), 1.48 (t, *J* = 7.4 Hz, 3H).

<sup>13</sup>C NMR (100 MHz, CDCl<sub>3</sub>): δ 179.9, 161.7, 142.0, 138.8, 137.0, 135.4, 133.6, 133.0, 130.4, 125.5, 124.3, 111.4, 61.2, 34.5, 14.4; 10.1.

elemental analysis: calcd (%) for C<sub>18</sub>H<sub>18</sub>N<sub>4</sub>O<sub>3</sub> (338.37): C 63.89, H 5.36; found: C 63.70, H 5.21.

**Ethyl 1-(4-(3,5-dimethylisoxazol-4-yl)phenyl)-5-methyl-1,2,3-triazole-4-carboxylate (16)**

From ethyl 1-(4-bromophenyl)-5-methyl-1,2,3-triazole-4-carboxylate **1** (0.310 g, 1 mmol) and 3,5-dimethylisoxazole (0.146 g, 1.5 mmol), **16** was obtained in 92% (0.300 g) yield.

<sup>1</sup>H NMR (400 MHz, CDCl<sub>3</sub>): δ 7.56 (d, *J* = 8.4 Hz, 2H), 7.48 (d, *J* = 8.4 Hz, 2H), 4.48 (q, *J* = 7.4 Hz, 2H), 2.66 (s, 3H), 2.47 (s, 3H), 2.32 (s, 3H), 1.46 (t, *J* = 7.4 Hz, 3H).

<sup>13</sup>C NMR (100 MHz, CDCl<sub>3</sub>): δ 165.8, 161.6, 158.3, 138.8, 136.8, 134.6, 132.6, 130.2, 125.7, 115.4, 61.1, 14.3, 11.6, 10.8, 10.0.

elemental analysis: calcd (%) for  $C_{17}H_{18}N_4O_3$  (326.36): C 62.57, H 5.56; found: C 62.67, H 5.39.

**Ethyl 5-ethyl-1-(4-(2-ethyl-4-methylthiazol-5-yl)phenyl)-1,2,3-triazole-4-carboxylate (17)**

From ethyl 1-(4-bromophenyl)-5-ethyl-1,2,3-triazole-4-carboxylate **2** (0.324 g, 1 mmol) and 2-ethyl-4-methylthiazole (0.191 g, 1.5 mmol), **17** was obtained in 90% (0.333 g) yield.

$^1H$  NMR (400 MHz,  $CDCl_3$ ):  $\delta$  7.62 (d,  $J = 8.4$  Hz, 2H), 7.49 (d,  $J = 8.4$  Hz, 2H), 4.48 (q,  $J = 7.4$  Hz, 2H), 3.10-3.00 (m, 4H), 2.52 (s, 3H), 1.46 (t,  $J = 7.4$  Hz, 3H), 1.42 (t,  $J = 7.4$  Hz, 3H), 1.22 (t,  $J = 7.4$  Hz, 3H).

$^{13}C$  NMR (100 MHz,  $CDCl_3$ ):  $\delta$  171.3, 161.6, 148.3, 144.6, 136.3, 135.0, 134.6, 130.3, 129.2, 126.0, 61.2, 27.1, 17.2, 16.3, 14.5, 14.3, 13.4.  
elemental analysis: calcd (%) for  $C_{19}H_{22}N_4O_2S$  (370.47): C 61.60, H 5.99; found: C 61.41, H 5.87.

**Ethyl 1-(4-(2-ethyl-4-methylthiazol-5-yl)phenyl)-5-phenyl-1,2,3-triazole-4-carboxylate (18)**

From ethyl 1-(4-bromophenyl)-5-phenyl-1,2,3-triazole-4-carboxylate **3** (0.372 g, 1 mmol) and 2-ethyl-4-methylthiazole (0.191 g, 1.5 mmol), **18** was obtained in 85% (0.355 g) yield.

$^1H$  NMR (400 MHz,  $CDCl_3$ ):  $\delta$  7.50-7.25 (m, 9H), 4.39 (q,  $J = 7.4$  Hz, 2H), 3.01 (q,  $J = 7.4$  Hz, 2H), 2.46 (s, 3H), 1.41 (t,  $J = 7.4$  Hz, 3H), 1.35 (t,  $J = 7.4$  Hz, 3H).

$^{13}C$  NMR (100 MHz,  $CDCl_3$ ):  $\delta$  171.0, 160.9, 148.0, 140.7, 137.1, 134.7, 133.9, 130.2, 130.0, 129.7, 129.1, 128.4, 125.7, 125.2, 61.2, 26.9, 16.2, 14.2, 14.1.

elemental analysis: calcd (%) for  $C_{23}H_{22}N_4O_2S$  (418.52): C 66.01, H 5.30; found: C 65.89, H 5.21.

**ethyl 1-(4-(3,5-dimethylisoxazol-4-yl)phenyl)-5-phenyl-1H-1,2,3-triazole-4-carboxylate (19)**

From ethyl 1-(4-bromophenyl)-5-phenyl-1,2,3-triazole-4-carboxylate **3** (0.372 g, 1 mmol) and 3,5-dimethylisoxazole (0.146 g, 1.5 mmol), **19** was obtained in 83% (0.322 g) yield.

$^1H$  NMR (400 MHz,  $CDCl_3$ ):  $\delta$  7.50-7.33 (m, 7H), 7.29 (d,  $J = 8.4$  Hz, 2H), 4.38 (q,  $J = 7.4$  Hz, 2H), 2.41 (s, 3H), 2.26 (s, 3H), 1.34 (t,  $J = 7.4$  Hz, 3H).

$^{13}C$  NMR (100 MHz,  $CDCl_3$ ):  $\delta$  165.7, 160.8, 158.2, 140.7, 137.1, 134.9, 131.9, 130.2, 130.0, 129.7, 128.4, 125.6, 125.4, 115.3, 61.2, 14.1, 11.6, 10.7.

elemental analysis: calcd (%) for  $C_{22}H_{20}N_4O_3$  (388.43): C 68.03, H 5.19; found: C 68.10, H 5.04.

**Ethyl 1-(3-(2-ethyl-4-methylthiazol-5-yl)phenyl)-5-methyl-1,2,3-triazole-4-carboxylate (20)**

From ethyl 1-(3-bromophenyl)-5-methyl-1,2,3-triazole-4-carboxylate **4** (0.310 g, 1 mmol) and 2-ethyl-4-methylthiazole (0.191 g, 1.5 mmol), **20** was obtained in 87% (0.310 g) yield.

$^1H$  NMR (400 MHz,  $CDCl_3$ ):  $\delta$  7.62-7.56 (m, 2H), 7.48 (s, 1H), 7.39 (d,  $J = 8.4$  Hz, 1H), 4.43 (q,  $J = 7.4$  Hz, 2H), 2.96 (q,  $J = 7.4$  Hz, 2H), 2.61 (s, 3H), 2.46 (s, 3H), 1.42 (t,  $J = 7.4$  Hz, 3H), 1.37 (t,  $J = 7.4$  Hz, 3H).

$^{13}C$  NMR (100 MHz,  $CDCl_3$ ):  $\delta$  173.3, 161.5, 149.0, 140.0, 136.3, 134.3, 132.5, 130.9, 130.0, 129.7, 128.4, 124.7, 61.0, 26.5, 15.3, 14.3, 13.9, 9.3.

elemental analysis: calcd (%) for  $C_{18}H_{20}N_4O_2S$  (356.44): C 60.65, H 5.66; found: C 60.47, H 5.41.

**Ethyl 5-methyl-1-(3-(5-methylthiophen-2-yl)phenyl)-1,2,3-triazole-4-carboxylate (21)**

From ethyl 1-(3-bromophenyl)-5-methyl-1,2,3-triazole-4-carboxylate **4** (0.310 g, 1 mmol) and 2-methylthiophene (0.147 g, 1.5 mmol), **21** was obtained in 81% (0.265 g) yield.

$^1H$  NMR (400 MHz,  $CDCl_3$ ):  $\delta$  7.73 (d,  $J = 8.4$  Hz, 1H), 7.62 (s, 1H), 7.56 (t,  $J = 7.8$  Hz, 1H), 7.31 (d,  $J = 8.4$  Hz, 1H), 7.20 (d,  $J = 3.5$  Hz, 1H), 6.79 (d,  $J = 3.5$  Hz, 1H), 4.50 (q,  $J = 7.4$  Hz, 2H), 2.64 (s, 3H), 2.55 (s, 3H), 1.48 (t,  $J = 7.4$  Hz, 3H).

$^{13}C$  NMR (100 MHz,  $CDCl_3$ ):  $\delta$  161.7, 141.1, 139.6, 138.9, 136.8, 136.6, 136.0, 130.0, 126.8, 126.5, 124.3, 123.3, 122.2, 61.1, 15.5, 14.4, 10.0.

elemental analysis: calcd (%) for  $C_{17}H_{17}N_3O_2S$  (327.40): C 62.37, H 5.23; found: C 62.52, H 5.14.

**Ethyl 1-(3-(3,5-dimethylisoxazol-4-yl)phenyl)-5-methyl-1,2,3-triazole-4-carboxylate (22)**

From ethyl 1-(3-bromophenyl)-5-methyl-1,2,3-triazole-4-carboxylate **4** (0.310 g, 1 mmol) and 3,5-dimethylisoxazole (0.146 g, 1.5 mmol), **22** was obtained in 92% (0.300 g) yield.

$^1H$  NMR (400 MHz,  $CDCl_3$ ):  $\delta$  7.66 (t,  $J = 7.8$  Hz, 1H), 7.47 (d,  $J = 8.4$  Hz, 2H), 7.37 (s, 1H), 4.46 (q,  $J = 7.4$  Hz, 2H), 2.64 (s, 3H), 2.44 (s, 3H), 2.30 (s, 3H), 1.44 (t,  $J = 7.4$  Hz, 3H).

$^{13}C$  NMR (100 MHz,  $CDCl_3$ ):  $\delta$  165.8, 161.5, 158.1, 138.7, 136.8, 135.9, 132.4, 130.5, 130.1, 125.7, 124.2, 115.2, 61.0, 14.3, 11.6, 10.7, 10.0.

elemental analysis: calcd (%) for  $C_{17}H_{18}N_4O_3$  (326.36): C 62.57, H 5.56; found: C 62.47, H 5.60.

**Ethyl 1-(3-(2-ethyl-4-methylthiazol-5-yl)phenyl)-5-phenyl-1,2,3-triazole-4-carboxylate (23)**

From ethyl 1-(3-bromophenyl)-5-phenyl-1,2,3-triazole-4-carboxylate **5** (0.372 g, 1 mmol) and 2-ethyl-4-methylthiazole (0.191 g, 1.5 mmol), **23** was obtained in 94% (0.393 g) yield.

$^1\text{H}$  NMR (400 MHz,  $\text{CDCl}_3$ ):  $\delta$  7.50-7.25 (m, 9H), 4.37 (q,  $J = 7.4$  Hz, 2H), 2.97 (q,  $J = 7.4$  Hz, 2H), 2.17 (s, 3H), 1.37 (t,  $J = 7.4$  Hz, 3H), 1.32 (t,  $J = 7.4$  Hz, 3H).

$^{13}\text{C}$  NMR (100 MHz,  $\text{CDCl}_3$ ):  $\delta$  171.1, 160.9, 147.9, 140.8, 137.2, 136.1, 133.9, 130.3, 130.1, 130.0, 129.7, 128.8, 128.6, 125.8, 125.5, 124.0, 61.3, 26.9, 15.8, 14.2, 14.1.

elemental analysis: calcd (%) for  $\text{C}_{23}\text{H}_{22}\text{N}_4\text{O}_2\text{S}$  (418.52): C 66.01, H 5.30; found: C 65.87, H 5.22.

#### Ethyl 1-(2-(2-ethyl-4-methylthiazol-5-yl)phenyl)-5-methyl-1,2,3-triazole-4-carboxylate (**24**)

From ethyl 1-(2-bromophenyl)-5-methyl-1,2,3-triazole-4-carboxylate **6** (0.310 g, 1 mmol) and 2-ethyl-4-methylthiazole (0.191 g, 1.5 mmol), **24** was obtained in 90% (0.320 g) yield.

$^1\text{H}$  NMR (400 MHz,  $\text{CDCl}_3$ ):  $\delta$  7.65 (t,  $J = 7.8$  Hz, 1H), 7.62-7.42 (m, 3H), 4.44 (q,  $J = 7.4$  Hz, 2H), 2.94 (q,  $J = 7.4$  Hz, 2H), 2.29 (s, 3H), 2.22 (s, 3H), 1.44 (t,  $J = 7.4$  Hz, 3H), 1.31 (t,  $J = 7.4$  Hz, 3H).

$^{13}\text{C}$  NMR (100 MHz,  $\text{CDCl}_3$ ):  $\delta$  173.3, 161.5, 149.0, 140.1, 136.3, 134.3, 132.5, 130.9, 130.0, 129.8, 128.4, 124.7, 61.0, 26.5, 15.3, 14.3, 13.9, 9.3.

elemental analysis: calcd (%) for  $\text{C}_{18}\text{H}_{20}\text{N}_4\text{O}_2\text{S}$  (356.44): C 60.65, H 5.66; found: C 60.47, H 5.41.

#### Ethyl 5-methyl-1-(2-(5-methylthiophen-2-yl)phenyl)-1,2,3-triazole-4-carboxylate (**25**)

From ethyl 1-(2-bromophenyl)-5-methyl-1,2,3-triazole-4-carboxylate **6** (0.310 g, 1 mmol) and 2-methylthiophene (0.147 g, 1.5 mmol), **25** was obtained in 92% (0.301 g) yield.

$^1\text{H}$  NMR (400 MHz,  $\text{CDCl}_3$ ):  $\delta$  7.69 (d,  $J = 8.2$  Hz, 1H), 7.60 (t,  $J = 7.8$  Hz, 1H), 7.47 (t,  $J = 7.8$  Hz, 1H), 7.37 (d,  $J = 8.2$  Hz, 1H), 6.55 (d,  $J = 3.5$  Hz, 1H), 6.33 (d,  $J = 3.5$  Hz, 1H), 4.45 (q,  $J = 7.4$  Hz, 2H), 2.42 (s, 3H), 2.18 (s, 3H), 1.46 (t,  $J = 7.4$  Hz, 3H).

$^{13}\text{C}$  NMR (100 MHz,  $\text{CDCl}_3$ ):  $\delta$  161.7, 142.1, 140.5, 136.3, 135.1, 132.7, 131.8, 131.1, 130.1, 128.6, 128.1, 126.6, 126.3, 61.0, 15.2, 14.3, 9.0.

elemental analysis: calcd (%) for  $\text{C}_{17}\text{H}_{17}\text{N}_3\text{O}_2\text{S}$  (327.40): C 62.37, H 5.23; found: C 62.42, H 5.31.

#### Ethyl [1,2,3]triazolo[1,5-f]phenanthridine-3-carboxylate (**26**) [3]

From ethyl 1-(2-bromophenyl)-5-phenyl-1,2,3-triazole-4-carboxylate **7** (0.372 g, 1 mmol) **26** was obtained in 85% (0.247 g) yield.

$^1\text{H}$  NMR (400 MHz,  $\text{CDCl}_3$ ):  $\delta$  9.80 (d,  $J = 8.0$  Hz, 1H), 8.93 (d,  $J = 8.0$  Hz, 1H), 8.52 (d,  $J = 8.0$  Hz, 2H), 7.88-7.68 (m, 4H), 4.63 (q,  $J = 7.4$  Hz, 2H), 1.58 (t,  $J = 7.4$  Hz, 3H).

$^{13}\text{C}$  NMR (100 MHz,  $\text{CDCl}_3$ ):  $\delta$  162.5, 133.7, 132.8, 130.8, 130.6, 129.9, 129.0, 128.9, 128.7, 128.0, 123.5, 122.6, 122.4, 121.4, 117.6, 61.7, 14.4.

1. T. Cantat, E. Génin, C. Giroud, G. Meyer, A. Jutand, J. Organomet. Chem. 687 (2003) 365-376.

2. R. Fusco, G. Bianchetti, D. Pocar, R. Ugo, Renato, Gazz. Chim. Ital. 92 (1962) 1040-1061.

3. Z. Liu, D. Zhu, B. Luo, N. Zhang, Q. Liu, Y. Hu, R. Pi, P. Huang, S. Wen, Org. Lett. 16 (2014), 5600-5603.
